# Supplementary material for: Low-temperature heat capacity and the thermodynamic functions of a novel ether-based ionic liquid 1-(2-ethoxyethyl)-3-ethylimidazolium thiocyanate
Source: Royal Society of Chemistry journal article supplement (doi:10.1039/d4ra06593j), 2024-01-01
Supplement: d4ra06593j1.pdf [file d4ra06593j1.pdf]

## Low-temperature heat capacity and the thermodynamic functions of a novel ether-based ionic liquid 1-(2-ethoxyethyl)-3-ethylimidazolium thiocyanate

Donglu Fu,<sup>a</sup> Zongren Song,<sup>\*a</sup> Jiankang Liu,<sup>a</sup> Jie Yang,<sup>a</sup> Shilong Suo,<sup>a</sup> Kunhao Liang,<sup>\*b</sup> Xiaoxue Ma,<sup>\*a</sup> Dawei Fang<sup>a</sup>

<sup>a</sup> Institute of Rare and Scattered Elements, College of Chemistry, Liaoning University, Shenyang, Liaoning 110036, China. E-mail: zongrensong@lnu.edu.cn.

<sup>b</sup> School of Opto-Electronic Engineering, Zaozhuang University, Zaozhuang, Shandong 277160, China

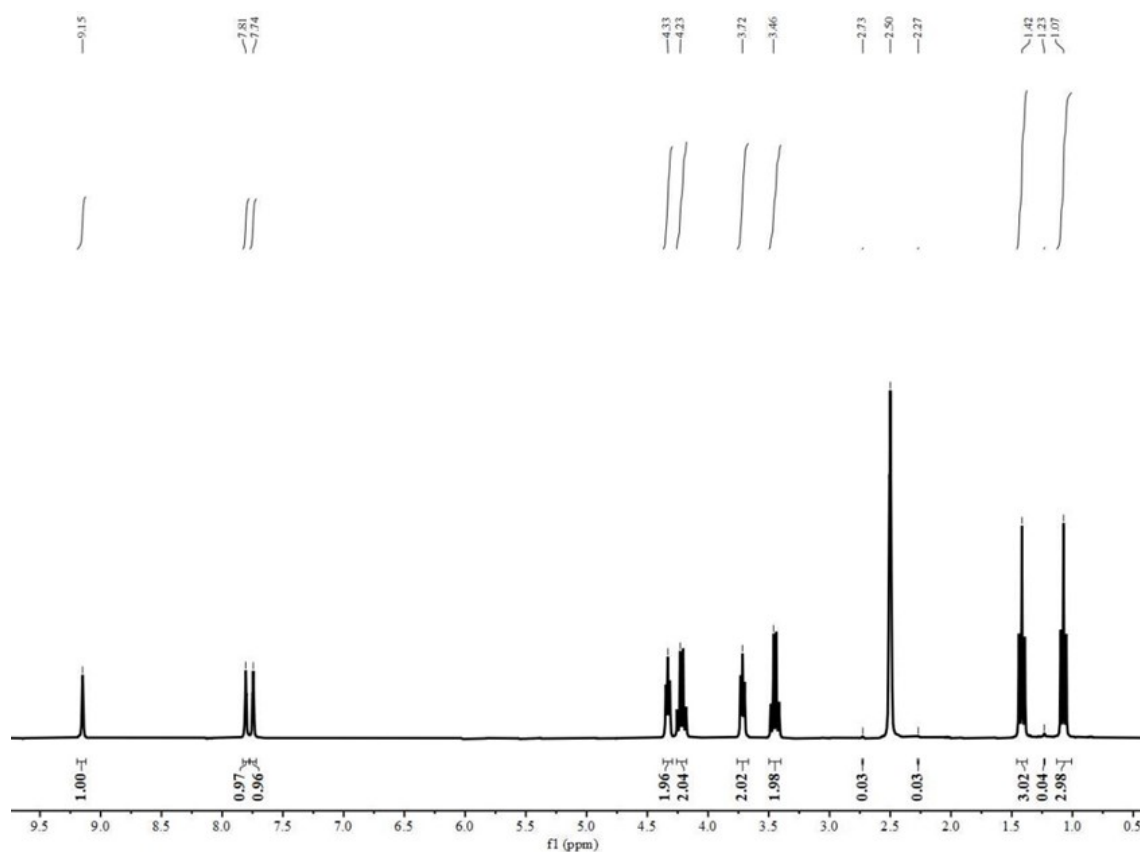

Figure S1. The <sup>1</sup>H-NMR spectroscopy of [C<sub>2</sub>2O<sub>2</sub>Im][SCN]

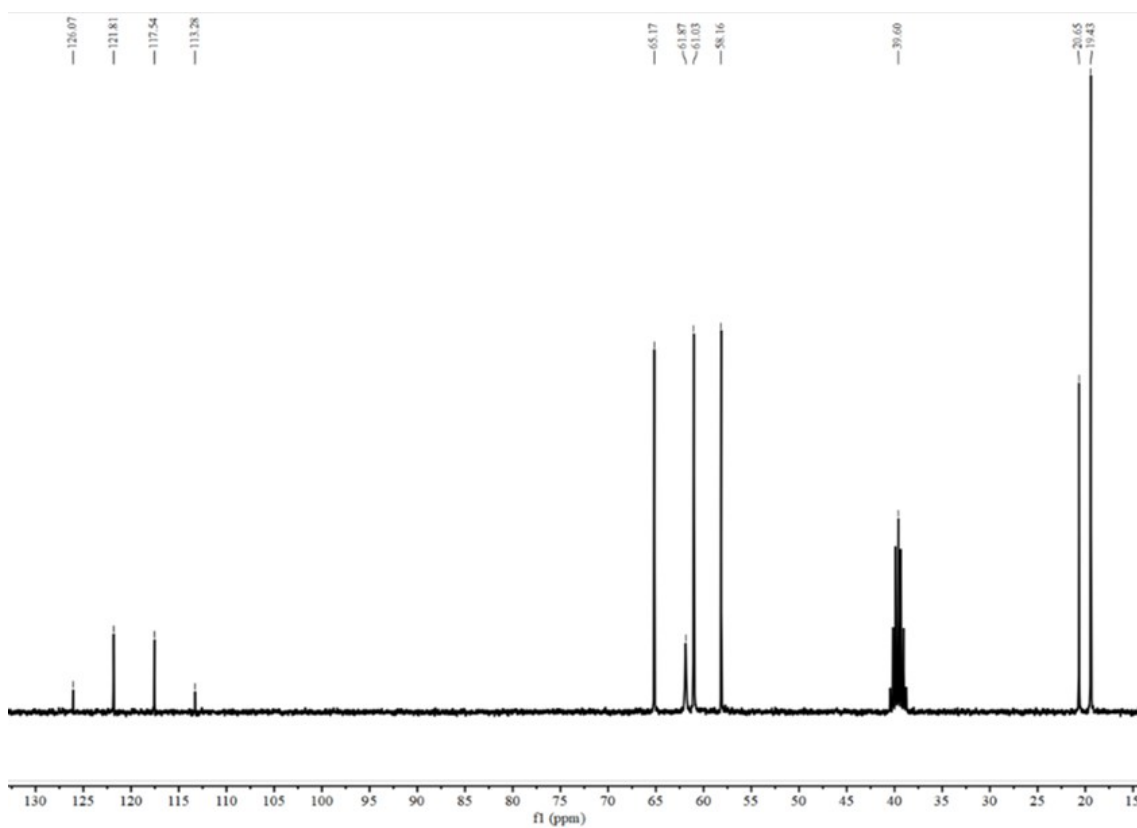

Figure S2. The  $^{13}\text{C}$ -NMR spectroscopy of  $[\text{C}_2\text{O}_2\text{Im}][\text{SCN}]$

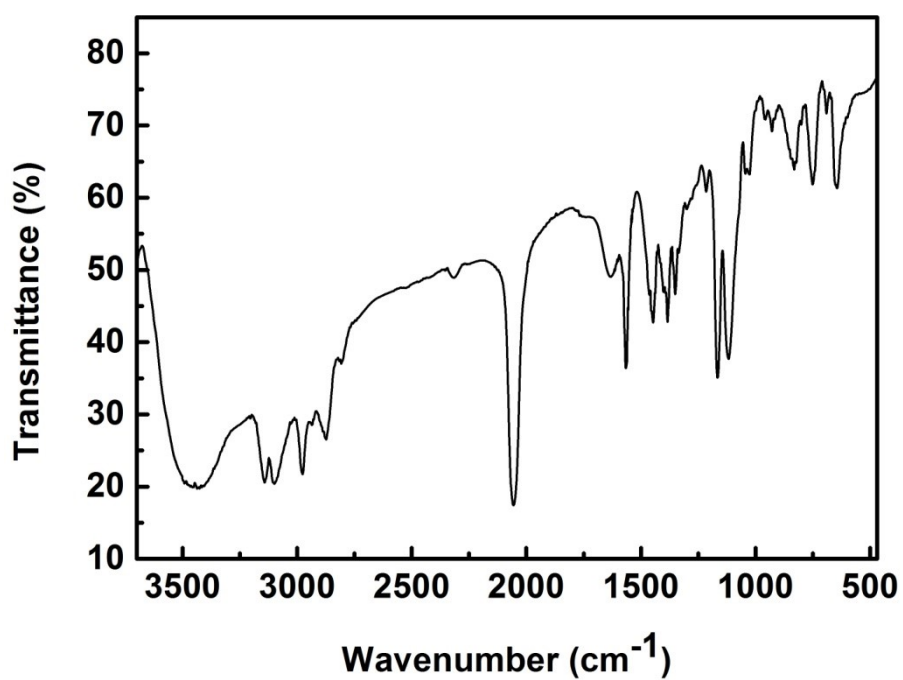

Figure S3. The FT-IR spectroscopy of  $[\text{C}_2\text{O}_2\text{Im}][\text{SCN}]$

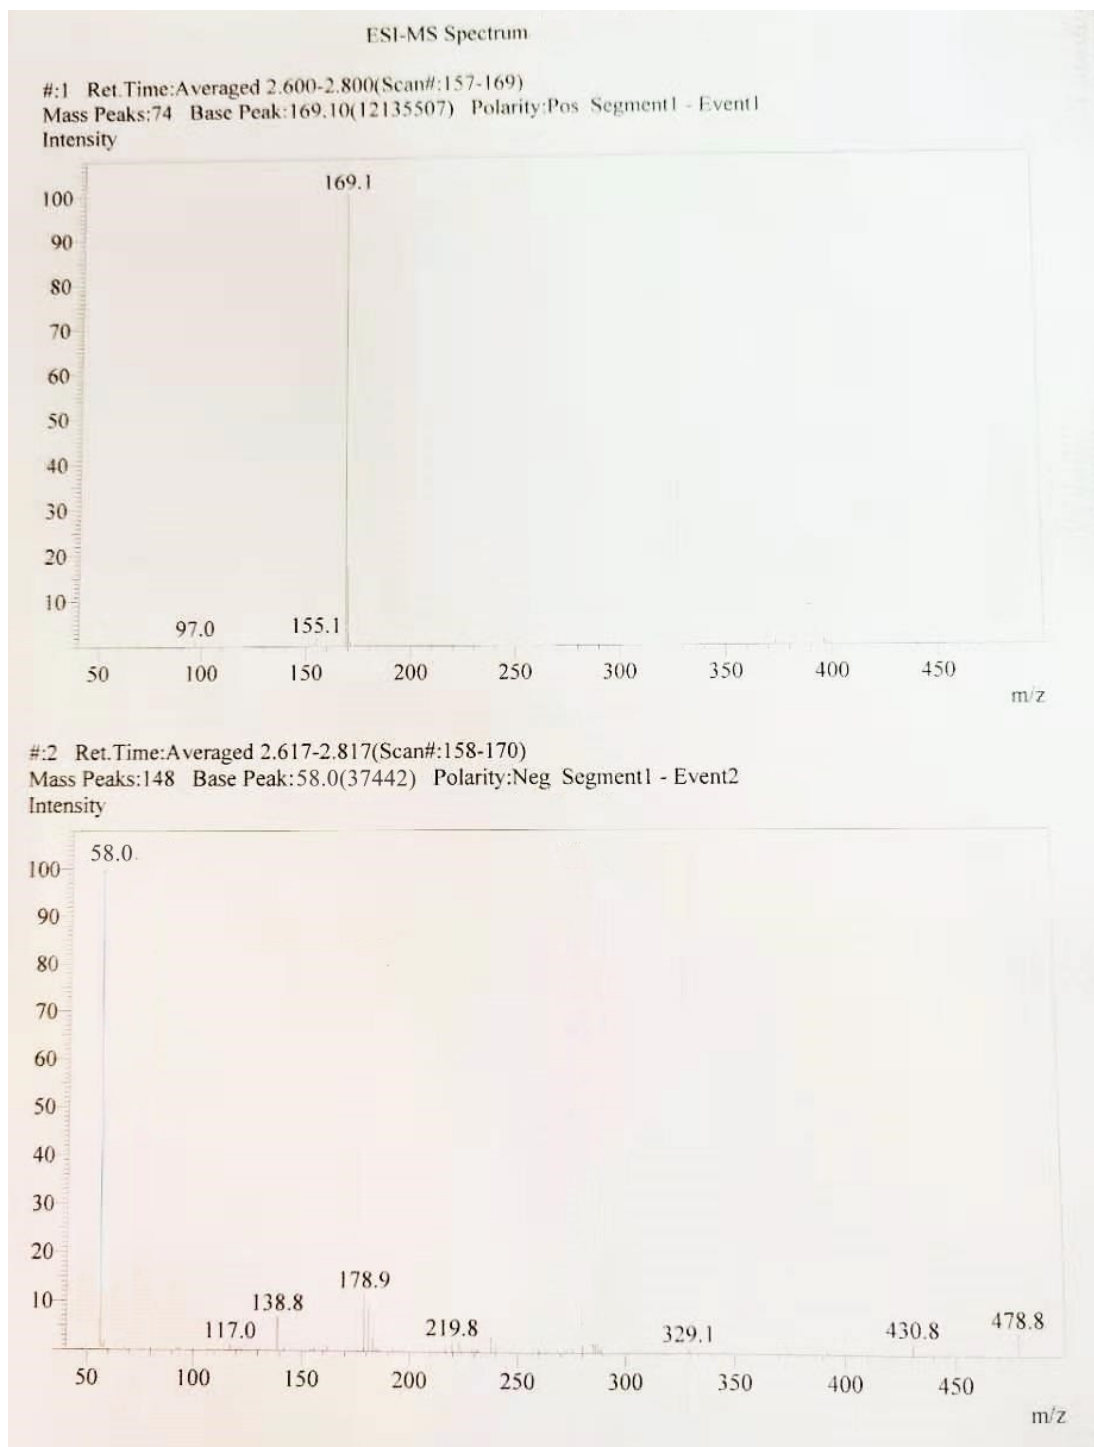

Figure S4. ESI-MS spectrum of  $[C_{22}O_2Im][SCN]$

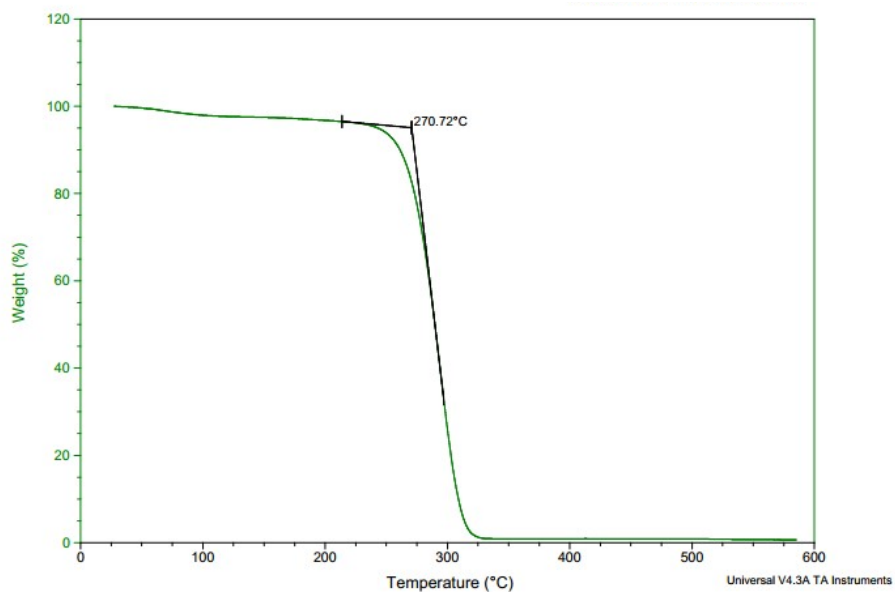

**Figure S5.** The TG spectroscopy of  $[C_22O_2Im][SCN]$

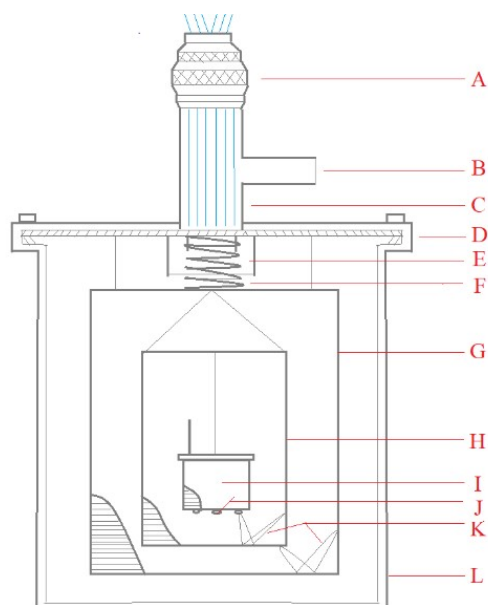

**Figure S6.** Cross-sectional diagram of adiabatic calorimetric cryostat: A is the sealing junction unit; B is the high vacuum system; C is the vacuum tube; D is the fuse gasket; E is the wire temperature control ring; F is the wire bundle; G and H are respectively the outer and inner adiabatic shields; I is the sample cell; J is the miniature platinum resistance thermometer; K are the chromel–copper thermocouples; L is a vacuum can.<sup>1,2</sup>

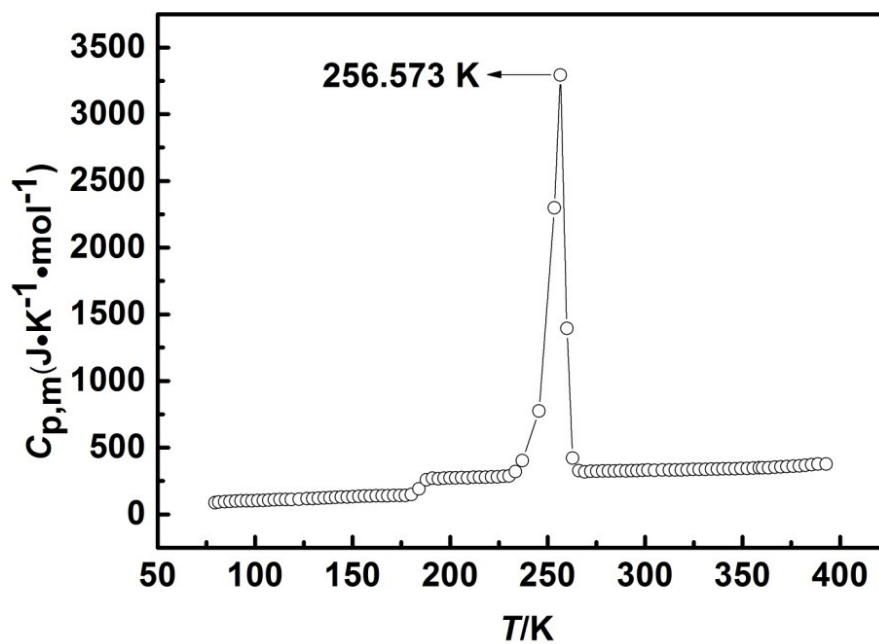

Figure S7. The experimental molar heat capacities in Table S6 of  $[\text{C}_2\text{O}_2\text{IM}][\text{SCN}]$  in the temperature range from 79 K to 393 K.

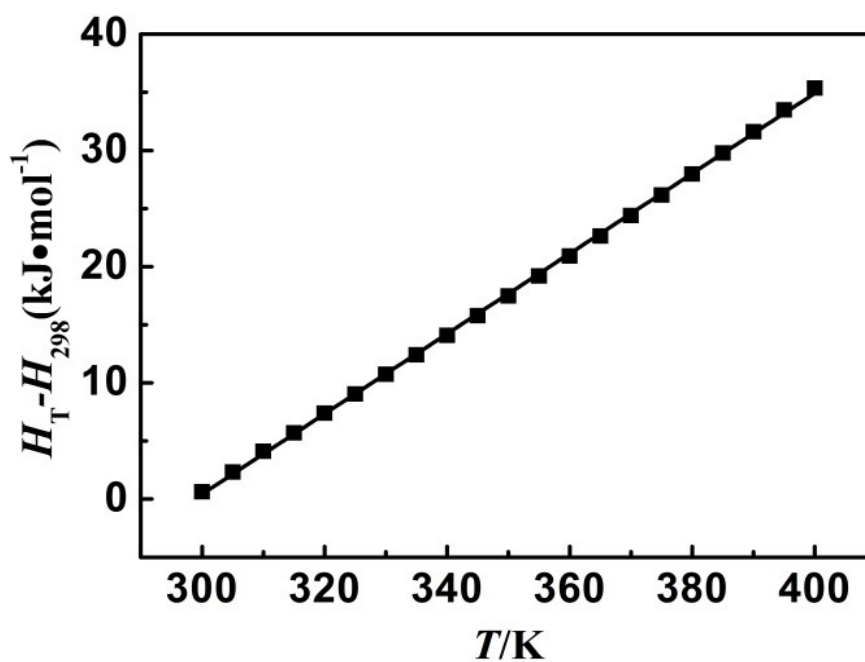

Figure S8. Plot of  $H_T - H_{298}$  vs.  $T$  of  $[\text{C}_2\text{O}_2\text{IM}][\text{SCN}]$ .

$$(H_T - H_{298} = -103.0038 + 0.3448T, R^2 = 0.9997)$$

**Table S1**

The heat capacities of empty equivalent in the temperature range from (78.254 – 400.134) K.

| $T/K$   | $H_0/J\cdot K^{-1}$ |
|---------|---------------------|---------|---------------------|---------|---------------------|---------|---------------------|
| 78.254  | 5.22                | 158.346 | 8.57                | 242.690 | 9.88                | 326.245 | 10.34               |
| 80.542  | 5.40                | 161.498 | 8.60                | 246.459 | 9.89                | 329.205 | 10.34               |
| 83.156  | 5.57                | 164.498 | 8.69                | 249.309 | 9.91                | 332.654 | 10.36               |
| 85.870  | 5.69                | 167.289 | 8.76                | 252.298 | 9.93                | 335.701 | 10.37               |
| 88.854  | 5.90                | 170.534 | 8.81                | 255.475 | 9.94                | 338.546 | 10.39               |
| 91.654  | 6.08                | 173.865 | 8.89                | 258.596 | 9.96                | 341.400 | 10.39               |
| 94.569  | 6.26                | 176.198 | 8.92                | 261.455 | 9.98                | 344.654 | 10.41               |
| 97.438  | 6.37                | 179.536 | 8.99                | 264.506 | 10.02               | 347.790 | 10.41               |
| 100.286 | 6.57                | 183.265 | 9.04                | 267.670 | 10.03               | 350.865 | 10.42               |
| 103.256 | 6.70                | 186.897 | 9.11                | 270.617 | 10.04               | 354.450 | 10.42               |
| 106.574 | 6.83                | 189.888 | 9.17                | 273.581 | 10.09               | 357.241 | 10.42               |
| 108.899 | 6.96                | 192.756 | 9.24                | 276.512 | 10.12               | 360.341 | 10.42               |
| 111.901 | 7.09                | 195.856 | 9.30                | 279.654 | 10.16               | 363.457 | 10.42               |
| 114.849 | 7.19                | 198.712 | 9.35                | 282.759 | 10.18               | 366.579 | 10.43               |
| 117.759 | 7.32                | 201.805 | 9.41                | 285.798 | 10.20               | 369.798 | 10.43               |
| 120.780 | 7.48                | 204.709 | 9.46                | 288.651 | 10.25               | 372.475 | 10.44               |
| 124.802 | 7.60                | 207.886 | 9.51                | 291.852 | 10.25               | 375.789 | 10.44               |
| 128.799 | 7.71                | 211.178 | 9.58                | 295.235 | 10.24               | 378.423 | 10.44               |
| 131.805 | 7.78                | 214.262 | 9.65                | 298.175 | 10.26               | 381.897 | 10.45               |
| 134.612 | 7.89                | 217.355 | 9.68                | 301.275 | 10.26               | 385.245 | 10.45               |
| 137.603 | 7.99                | 220.133 | 9.79                | 304.361 | 10.27               | 388.103 | 10.45               |
| 140.700 | 8.09                | 223.480 | 9.95                | 307.257 | 10.28               | 391.324 | 10.46               |
| 143.260 | 8.18                | 226.649 | 10.19               | 310.578 | 10.30               | 394.245 | 10.44               |
| 146.390 | 8.26                | 229.690 | 9.78                | 313.678 | 10.31               | 397.312 | 10.46               |
| 149.450 | 8.31                | 232.750 | 9.77                | 316.865 | 10.31               | 400.134 | 10.46               |

|         |      |         |      |         |       |
|---------|------|---------|------|---------|-------|
| 152.378 | 8.39 | 235.638 | 9.81 | 319.745 | 10.32 |
| 155.539 | 8.46 | 238.780 | 9.84 | 322.896 | 10.33 |

The standard uncertainty (0.68 level of confidence):  $u(T) = 0.001$  K.  $u(p) = \pm 0.001$  MPa.

**Table S2**

The experimental molar heat capacities of  $\alpha$ -Al<sub>2</sub>O<sub>3</sub> in the temperature range from (79.432 – 400.854) K.

| <i>T</i> /K | <i>C</i> <sub>p,m</sub> |
|-------------|-------------------------|-------------|-------------------------|-------------|-------------------------|-------------|-------------------------|
| 79.432      | 6.584                   | 158.465     | 35.952                  | 239.562     | 64.301                  | 322.54      | 83.653                  |
| 82.160      | 7.326                   | 161.543     | 36.369                  | 243.145     | 65.154                  | 325.845     | 84.845                  |
| 84.529      | 8.375                   | 164.482     | 37.901                  | 246.857     | 66.246                  | 328.652     | 85.145                  |
| 88.156      | 9.652                   | 167.803     | 38.850                  | 249.665     | 67.653                  | 331.854     | 85.596                  |
| 91.312      | 10.452                  | 170.489     | 40.232                  | 253.852     | 67.952                  | 335.740     | 86.652                  |
| 94.843      | 11.295                  | 173.800     | 41.859                  | 256.251     | 68.603                  | 338.453     | 86.528                  |
| 97.456      | 11.832                  | 176.693     | 42.952                  | 259.456     | 69.635                  | 341.647     | 87.354                  |
| 100.320     | 12.990                  | 179.752     | 43.539                  | 262.852     | 70.125                  | 345.045     | 87.748                  |
| 103.168     | 13.695                  | 183.852     | 45.002                  | 265.542     | 71.352                  | 348.653     | 88.465                  |
| 105.375     | 14.643                  | 187.256     | 46.198                  | 268.154     | 72.562                  | 351.543     | 89.248                  |
| 108.984     | 15.746                  | 190.805     | 47.439                  | 271.950     | 72.852                  | 354.548     | 89.469                  |
| 111.562     | 17.135                  | 193.653     | 48.496                  | 274.742     | 73.642                  | 358.485     | 90.254                  |
| 114.802     | 18.210                  | 196.601     | 49.798                  | 278.125     | 74.352                  | 361.528     | 90.542                  |
| 117.524     | 19.350                  | 199.685     | 50.852                  | 281.542     | 75.782                  | 364.432     | 91.301                  |
| 120.952     | 20.580                  | 202.693     | 52.159                  | 284.746     | 75.746                  | 367.685     | 91.654                  |
| 124.625     | 21.639                  | 205.798     | 53.253                  | 287.425     | 76.526                  | 370.568     | 91.875                  |
| 128.952     | 23.693                  | 208.982     | 54.203                  | 290.268     | 77.201                  | 374.654     | 92.594                  |
| 131.596     | 24.456                  | 211.695     | 55.502                  | 293.460     | 77.558                  | 377.413     | 93.265                  |
| 134.693     | 25.853                  | 215.120     | 56.327                  | 296.685     | 78.624                  | 380.580     | 93.452                  |
| 137.695     | 27.285                  | 218.146     | 57.258                  | 299.524     | 79.526                  | 383.758     | 93.748                  |

|         |        |         |        |         |        |         |        |
|---------|--------|---------|--------|---------|--------|---------|--------|
| 140.546 | 28.23  | 221.650 | 58.653 | 302.532 | 80.001 | 387.263 | 94.254 |
| 143.592 | 29.479 | 224.523 | 59.496 | 306.112 | 80.652 | 390.245 | 94.548 |
| 146.593 | 30.850 | 227.205 | 60.163 | 309.450 | 81.650 | 393.498 | 95.361 |
| 149.324 | 31.958 | 230.116 | 61.041 | 312.521 | 82.116 | 396.845 | 95.956 |
| 152.752 | 33.201 | 233.245 | 62.885 | 315.743 | 82.589 | 400.854 | 96.364 |
| 155.502 | 34.302 | 236.452 | 62.745 | 318.798 | 83.654 |         |        |

The standard uncertainty (0.68 level of confidence):  $u(T) = 0.001$  K.  $u(p) = \pm 0.001$ MPa. The maximum permissible error of high precision automatic adiabatic calorimeter is  $\pm 0.130$  %.

**Table S3**

The experimental and fitted heat capacity values of empty equivalent and relative deviation in the temperature range of 78.245 K – 400.134 K.

| $T/K$   | $H_0/J \cdot K^{-1}$ | $H_{0(f)}/J \cdot K^{-1}$ | $A/\%$ | $T/K$   | $H_0/J \cdot K^{-1}$ | $H_{0(f)}/J \cdot K^{-1}$ | $A/\%$ |
|---------|----------------------|---------------------------|--------|---------|----------------------|---------------------------|--------|
| 78.254  | 5.22                 | 5.241                     | -0.397 | 238.780 | 9.84                 | 9.833                     | 0.076  |
| 80.542  | 5.40                 | 5.382                     | 0.327  | 242.690 | 9.88                 | 9.863                     | 0.169  |
| 83.156  | 5.57                 | 5.546                     | 0.440  | 246.459 | 9.89                 | 9.896                     | -0.060 |
| 85.870  | 5.69                 | 5.715                     | -0.433 | 249.309 | 9.91                 | 9.916                     | -0.059 |
| 88.854  | 5.90                 | 5.898                     | 0.030  | 252.298 | 9.93                 | 9.932                     | -0.020 |
| 91.654  | 6.08                 | 6.066                     | 0.223  | 255.475 | 9.94                 | 9.946                     | -0.063 |
| 94.569  | 6.26                 | 6.236                     | 0.381  | 258.596 | 9.96                 | 9.961                     | -0.009 |
| 97.438  | 6.37                 | 6.397                     | -0.424 | 261.455 | 9.98                 | 9.977                     | 0.026  |
| 100.286 | 6.57                 | 6.550                     | 0.304  | 264.506 | 10.02                | 10.000                    | 0.201  |
| 103.256 | 6.70                 | 6.702                     | -0.032 | 267.670 | 10.03                | 10.029                    | 0.012  |
| 106.574 | 6.83                 | 6.863                     | -0.478 | 270.617 | 10.04                | 10.059                    | -0.192 |
| 108.899 | 6.96                 | 6.970                     | -0.139 | 273.581 | 10.09                | 10.091                    | -0.012 |
| 111.901 | 7.09                 | 7.101                     | -0.153 | 276.512 | 10.12                | 10.122                    | -0.015 |
| 114.849 | 7.19                 | 7.223                     | -0.453 | 279.654 | 10.16                | 10.151                    | 0.091  |
| 117.759 | 7.32                 | 7.337                     | -0.226 | 282.759 | 10.18                | 10.177                    | 0.027  |
| 120.780 | 7.48                 | 7.449                     | 0.422  | 285.798 | 10.20                | 10.207                    | -0.064 |



---

|         |      |       |        |         |       |        |        |
|---------|------|-------|--------|---------|-------|--------|--------|
| 124.802 | 7.60 | 7.589 | 0.144  | 288.651 | 10.25 | 10.248 | 0.018  |
| 128.799 | 7.71 | 7.720 | -0.132 | 291.852 | 10.25 | 10.216 | 0.335  |
| 131.805 | 7.78 | 7.814 | -0.437 | 295.235 | 10.24 | 10.238 | 0.022  |
| 134.612 | 7.89 | 7.899 | -0.112 | 298.175 | 10.26 | 10.252 | 0.078  |
| 137.603 | 7.99 | 7.986 | 0.047  | 301.275 | 10.26 | 10.264 | -0.036 |
| 140.700 | 8.09 | 8.074 | 0.195  | 304.361 | 10.27 | 10.273 | -0.034 |
| 143.260 | 8.18 | 8.145 | 0.427  | 307.257 | 10.28 | 10.282 | -0.018 |
| 146.390 | 8.26 | 8.230 | 0.361  | 310.578 | 10.30 | 10.291 | 0.087  |
| 149.450 | 8.31 | 8.312 | -0.020 | 313.678 | 10.31 | 10.300 | 0.097  |
| 152.378 | 8.39 | 8.388 | 0.023  | 316.865 | 10.31 | 10.310 | 0.004  |
| 155.539 | 8.46 | 8.469 | -0.106 | 319.745 | 10.32 | 10.319 | 0.011  |
| 158.346 | 8.57 | 8.539 | 0.359  | 322.896 | 10.33 | 10.329 | 0.006  |
| 161.498 | 8.60 | 8.617 | -0.193 | 326.245 | 10.34 | 10.341 | -0.010 |
| 164.498 | 8.69 | 8.688 | 0.021  | 329.205 | 10.34 | 10.351 | -0.111 |
| 167.289 | 8.76 | 8.753 | 0.081  | 332.654 | 10.36 | 10.363 | -0.034 |
| 170.534 | 8.81 | 8.826 | -0.177 | 335.701 | 10.37 | 10.374 | -0.036 |
| 173.865 | 8.89 | 8.897 | -0.079 | 338.546 | 10.39 | 10.383 | 0.069  |
| 176.198 | 8.92 | 8.945 | -0.279 | 341.400 | 10.39 | 10.391 | -0.012 |
| 179.536 | 8.99 | 9.010 | -0.226 | 344.654 | 10.41 | 10.400 | 0.097  |
| 183.265 | 9.04 | 9.079 | -0.428 | 347.790 | 10.41 | 10.407 | 0.027  |
| 186.897 | 9.11 | 9.141 | -0.339 | 350.865 | 10.42 | 10.413 | 0.064  |
| 189.888 | 9.17 | 9.189 | -0.209 | 354.450 | 10.42 | 10.419 | 0.008  |
| 192.756 | 9.24 | 9.233 | 0.073  | 357.241 | 10.42 | 10.423 | -0.026 |
| 195.856 | 9.30 | 9.279 | 0.224  | 360.341 | 10.42 | 10.426 | -0.057 |
| 198.712 | 9.35 | 9.321 | 0.310  | 363.457 | 10.42 | 10.429 | -0.082 |
| 201.805 | 9.41 | 9.367 | 0.455  | 366.579 | 10.43 | 10.431 | -0.007 |

---

|         |       |        |        |         |         |        |        |
|---------|-------|--------|--------|---------|---------|--------|--------|
| 204.709 | 9.46  | 9.413  | 0.495  | 369.798 | 10.43   | 10.433 | -0.027 |
| 207.886 | 9.51  | 9.469  | 0.431  | 372.475 | 10.44   | 10.435 | 0.052  |
| 211.178 | 9.58  | 9.536  | 0.457  | 375.789 | 10.44   | 10.437 | 0.029  |
| 214.262 | 9.65  | 9.612  | 0.394  | 378.423 | 10.44   | 10.439 | 0.007  |
| 217.355 | 9.68  | 9.705  | -0.259 | 381.897 | 10.45   | 10.443 | 0.069  |
| 220.133 | 9.79  | 9.808  | -0.180 | 385.245 | 10.45   | 10.447 | 0.031  |
| 223.480 | 9.95  | 9.962  | -0.120 | 388.103 | 10.45   | 10.450 | -0.004 |
| 226.649 | 10.19 | 10.147 | 0.425  | 391.324 | 10.46   | 10.454 | 0.053  |
| 229.690 | 9.78  | 9.762  | 0.188  | 394.245 | 10.4499 | 10.457 | -0.071 |
| 232.750 | 9.77  | 9.727  | 0.442  | 397.312 | 10.461  | 10.459 | 0.020  |
| 235.638 | 9.81  | 9.830  | -0.204 | 400.134 | 10.464  | 10.458 | 0.059  |

$H_{0(f)}$  is the fitted heat capacity value,  $A$  is the relative deviation.

**Table S4**

The experimental and fitted heat capacity values of  $\alpha\text{-Al}_2\text{O}_3$  and relative deviation in the temperature range of 79.432 K – 400.854 K.

| $T/\text{K}$ | $C_{p,m}$ | $C_{p,m(f)}$ | $A/\%$ | $T/\text{K}$ | $C_{p,m}$ | $C_{p,m(f)}$ | $A/\%$ |
|--------------|-----------|--------------|--------|--------------|-----------|--------------|--------|
| 79.432       | 6.684     | 6.713        | -0.430 | 239.562      | 64.301    | 64.046       | 0.399  |
| 82.160       | 7.486     | 7.516        | -0.399 | 243.145      | 65.154    | 65.193       | -0.059 |
| 84.529       | 8.225     | 8.210        | 0.185  | 246.857      | 66.246    | 66.398       | -0.229 |
| 88.156       | 9.320     | 9.277        | 0.464  | 249.665      | 67.653    | 67.146       | 0.755  |
| 91.312       | 10.252    | 10.220       | 0.317  | 253.852      | 67.952    | 68.179       | -0.333 |
| 94.843       | 11.295    | 11.299       | -0.036 | 256.251      | 68.603    | 68.774       | -0.248 |
| 97.456       | 12.102    | 12.119       | -0.138 | 259.456      | 69.635    | 69.596       | 0.056  |
| 100.320      | 12.990    | 13.040       | -0.385 | 262.852      | 70.225    | 70.505       | -0.397 |
| 103.168      | 13.915    | 13.982       | -0.478 | 265.542      | 71.352    | 71.243       | 0.153  |
| 105.375      | 14.693    | 14.730       | -0.248 | 268.154      | 72.162    | 71.964       | 0.276  |
| 108.984      | 15.926    | 15.986       | -0.376 | 271.950      | 72.852    | 72.993       | -0.193 |

---

|         |        |        |        |         |        |        |        |
|---------|--------|--------|--------|---------|--------|--------|--------|
| 111.562 | 16.935 | 16.909 | 0.155  | 274.742 | 73.642 | 73.720 | -0.105 |
| 114.802 | 18.021 | 18.097 | -0.418 | 278.125 | 74.352 | 74.554 | -0.271 |
| 117.524 | 19.135 | 19.117 | 0.093  | 281.542 | 75.582 | 75.340 | 0.321  |
| 120.952 | 20.458 | 20.429 | 0.141  | 284.746 | 75.746 | 76.033 | -0.377 |
| 124.625 | 21.839 | 21.864 | -0.113 | 287.425 | 76.526 | 76.589 | -0.083 |
| 128.952 | 23.693 | 23.585 | 0.460  | 290.268 | 77.201 | 77.172 | 0.038  |
| 131.596 | 24.556 | 24.649 | -0.376 | 293.460 | 77.558 | 77.836 | -0.357 |
| 134.693 | 25.853 | 25.904 | -0.197 | 296.685 | 78.624 | 78.539 | 0.108  |
| 137.695 | 27.225 | 27.127 | 0.361  | 299.524 | 79.526 | 79.196 | 0.416  |
| 140.546 | 28.230 | 28.291 | -0.216 | 302.532 | 80.001 | 79.932 | 0.086  |
| 143.592 | 29.479 | 29.535 | -0.190 | 306.112 | 80.652 | 80.833 | -0.224 |
| 146.593 | 30.850 | 30.758 | 0.297  | 309.45  | 81.650 | 81.629 | 0.025  |
| 149.324 | 31.958 | 31.868 | 0.283  | 312.521 | 82.116 | 82.218 | -0.124 |
| 152.752 | 33.201 | 33.252 | -0.154 | 315.743 | 82.589 | 82.518 | 0.086  |
| 155.502 | 34.302 | 34.355 | -0.155 | 318.798 | 83.654 | 83.488 | 0.199  |
| 158.465 | 35.552 | 35.534 | 0.050  | 322.54  | 83.853 | 84.091 | -0.283 |
| 161.543 | 36.669 | 36.748 | -0.214 | 325.845 | 84.845 | 84.630 | 0.254  |
| 164.482 | 37.901 | 37.895 | 0.015  | 328.652 | 85.145 | 85.095 | 0.058  |
| 167.803 | 39.185 | 39.178 | 0.018  | 331.854 | 85.596 | 85.635 | -0.045 |
| 170.489 | 40.232 | 40.205 | 0.068  | 335.74  | 86.652 | 86.300 | 0.408  |
| 173.800 | 41.459 | 41.457 | 0.005  | 338.453 | 86.528 | 86.770 | -0.279 |
| 176.693 | 42.652 | 42.540 | 0.263  | 341.647 | 87.354 | 87.327 | 0.031  |
| 179.752 | 43.539 | 43.675 | -0.311 | 345.045 | 87.748 | 87.920 | -0.196 |
| 183.852 | 45.002 | 45.180 | -0.394 | 348.653 | 88.465 | 88.546 | -0.091 |
| 187.256 | 46.198 | 46.418 | -0.475 | 351.543 | 89.248 | 89.042 | 0.232  |
| 190.805 | 47.539 | 47.700 | -0.338 | 354.548 | 89.469 | 89.549 | -0.089 |
| 193.653 | 48.496 | 48.723 | -0.466 | 358.485 | 90.254 | 90.197 | 0.063  |

---

|         |        |        |        |         |        |        |        |
|---------|--------|--------|--------|---------|--------|--------|--------|
| 196.601 | 49.798 | 49.778 | 0.040  | 361.528 | 90.542 | 90.683 | -0.156 |
| 199.685 | 50.852 | 50.878 | -0.051 | 364.432 | 91.301 | 91.134 | 0.183  |
| 202.693 | 52.159 | 51.947 | 0.407  | 367.685 | 91.654 | 91.623 | 0.034  |
| 205.798 | 53.253 | 53.049 | 0.385  | 370.568 | 91.875 | 92.043 | -0.183 |
| 208.982 | 54.203 | 54.174 | 0.053  | 374.654 | 92.594 | 92.619 | -0.028 |
| 211.695 | 55.402 | 55.130 | 0.494  | 377.413 | 93.265 | 92.998 | 0.287  |
| 215.120 | 56.327 | 56.329 | -0.004 | 380.58  | 93.452 | 93.427 | 0.027  |
| 218.146 | 57.258 | 57.380 | -0.212 | 383.758 | 93.748 | 93.855 | -0.114 |
| 221.650 | 58.653 | 58.580 | 0.125  | 387.263 | 94.254 | 94.334 | -0.085 |
| 224.523 | 59.496 | 59.545 | -0.083 | 390.245 | 94.548 | 94.753 | -0.217 |
| 227.205 | 60.163 | 60.426 | -0.436 | 393.498 | 95.361 | 95.234 | 0.134  |
| 230.116 | 61.141 | 61.354 | -0.348 | 396.845 | 95.956 | 95.764 | 0.200  |
| 233.245 | 62.885 | 62.309 | 0.925  | 400.854 | 96.364 | 96.467 | -0.106 |
| 236.452 | 62.745 | 63.227 | -0.763 |         |        |        |        |

$C_{p,m(f)}$  is the fitted heat capacity value,  $A$  is the relative deviation.

**Table S5**

The experimental and recommended NIST heat capacity values of  $\alpha$ -Al<sub>2</sub>O<sub>3</sub>, and relative deviation in the temperature range of 80 K - 395 K.

| $T/K$ | $C_{p,m(r)}$ | $C_{p,m(e)}$ | $A/\%$ | $T/K$ | $C_{p,m(r)}$ | $C_{p,m(e)}$ | $A/\%$ |
|-------|--------------|--------------|--------|-------|--------------|--------------|--------|
| 80    | 6.901        | 6.875        | -0.378 | 240   | 64.184       | 64.493       | 0.482  |
| 85    | 8.234        | 8.262        | 0.345  | 245   | 65.649       | 65.542       | -0.163 |
| 90    | 9.678        | 9.639        | -0.405 | 250   | 67.076       | 67.346       | 0.403  |
| 95    | 11.221       | 11.223       | 0.017  | 255   | 68.466       | 68.191       | -0.401 |
| 100   | 12.855       | 12.880       | 0.191  | 260   | 69.82        | 69.722       | -0.141 |
| 105   | 14.567       | 14.530       | -0.253 | 265   | 71.137       | 71.055       | -0.115 |
| 110   | 16.347       | 16.275       | -0.438 | 270   | 72.419       | 72.751       | 0.458  |
| 115   | 18.184       | 18.250       | 0.364  | 275   | 73.656       | 73.702       | 0.062  |

|     |        |        |        |     |        |        |        |
|-----|--------|--------|--------|-----|--------|--------|--------|
| 120 | 20.069 | 20.092 | 0.115  | 280 | 74.871 | 75.225 | 0.473  |
| 125 | 21.993 | 21.898 | -0.432 | 285 | 76.053 | 75.778 | -0.361 |
| 130 | 23.951 | 24.013 | 0.258  | 290 | 77.204 | 77.164 | -0.052 |
| 135 | 25.935 | 26.012 | 0.296  | 295 | 78.324 | 77.997 | -0.418 |
| 140 | 27.935 | 28.050 | 0.411  | 300 | 79.415 | 79.628 | 0.268  |
| 145 | 29.943 | 30.009 | 0.220  | 305 | 80.476 | 80.391 | -0.105 |
| 150 | 31.952 | 32.005 | 0.166  | 310 | 81.509 | 81.774 | 0.325  |
| 155 | 33.957 | 34.045 | 0.260  | 315 | 82.514 | 82.398 | -0.140 |
| 160 | 35.953 | 36.060 | 0.298  | 320 | 83.493 | 83.698 | 0.246  |
| 165 | 37.934 | 38.104 | 0.447  | 325 | 84.445 | 84.546 | 0.120  |
| 170 | 39.896 | 39.956 | 0.151  | 330 | 85.373 | 85.246 | -0.148 |
| 175 | 41.836 | 42.006 | 0.406  | 335 | 86.276 | 86.560 | 0.329  |
| 180 | 43.752 | 43.601 | -0.345 | 340 | 87.155 | 86.858 | -0.340 |
| 185 | 45.640 | 45.424 | -0.474 | 345 | 88.011 | 87.744 | -0.304 |
| 190 | 47.499 | 47.357 | -0.299 | 350 | 88.844 | 88.876 | 0.036  |
| 195 | 49.326 | 49.102 | -0.454 | 355 | 89.656 | 89.533 | -0.137 |
| 200 | 51.121 | 50.975 | -0.285 | 360 | 90.447 | 90.380 | -0.074 |
| 205 | 52.881 | 53.017 | 0.257  | 365 | 91.217 | 91.411 | 0.213  |
| 210 | 54.606 | 54.689 | 0.152  | 370 | 91.967 | 91.819 | -0.161 |
| 215 | 56.295 | 56.301 | 0.011  | 375 | 92.698 | 92.685 | -0.015 |
| 220 | 57.948 | 58.012 | 0.110  | 380 | 93.411 | 93.434 | 0.025  |
| 225 | 59.564 | 59.623 | 0.099  | 385 | 94.105 | 93.939 | -0.177 |
| 230 | 61.141 | 60.979 | -0.265 | 390 | 94.782 | 94.509 | -0.288 |
| 235 | 62.682 | 62.817 | 0.215  | 395 | 95.441 | 95.680 | 0.250  |

$C_{p,m(r)}$  is recommended NIST values,  $C_{p,m(e)}$  is the experimental heat capacity,  $A$  is the relative deviation.

**Table S6**

The second set of molar heat capacity experimental values of  $[C_2O_2Im][SCN]$  in the temperature

range from 79.373 K to 392.829 K with 3 K intervals.

| $T/K$   | $C_{p,m}/J\cdot K^{-1}\cdot mol^{-1}$ | $T/K$   | $C_{p,m}/J\cdot K^{-1}\cdot mol^{-1}$ | $T/K$   | $C_{p,m}/J\cdot K^{-1}\cdot mol^{-1}$ |
|---------|---------------------------------------|---------|---------------------------------------|---------|---------------------------------------|
| 79.373  | 85.950                                | 180.100 | 147.560                               | 295.937 | 327.875                               |
| 81.458  | 90.763                                | 183.966 | 191.268                               | 298.713 | 328.520                               |
| 84.370  | 94.461                                | 187.875 | 259.495                               | 301.481 | 330.723                               |
| 87.200  | 96.423                                | 190.944 | 270.757                               | 304.881 | 330.494                               |
| 90.045  | 97.921                                | 194.000 | 266.897                               | 308.898 | 330.880                               |
| 92.866  | 100.040                               | 196.997 | 270.144                               | 312.513 | 331.909                               |
| 95.668  | 100.931                               | 199.912 | 272.855                               | 315.582 | 332.493                               |
| 98.490  | 102.022                               | 202.899 | 273.833                               | 318.643 | 332.866                               |
| 101.336 | 103.216                               | 205.954 | 275.517                               | 321.706 | 334.283                               |
| 104.208 | 104.284                               | 209.008 | 273.494                               | 324.768 | 335.541                               |
| 107.071 | 106.978                               | 212.060 | 276.478                               | 327.839 | 336.313                               |
| 109.925 | 108.696                               | 215.114 | 277.911                               | 330.932 | 337.175                               |
| 112.816 | 109.457                               | 218.170 | 278.282                               | 334.021 | 337.812                               |
| 115.701 | 110.331                               | 221.251 | 279.435                               | 337.071 | 339.396                               |
| 118.588 | 111.325                               | 224.357 | 280.011                               | 340.108 | 340.462                               |
| 122.642 | 114.088                               | 227.415 | 285.635                               | 343.119 | 340.821                               |
| 126.689 | 116.942                               | 230.360 | 287.588                               | 346.187 | 340.865                               |
| 129.598 | 118.578                               | 233.540 | 321.055                               | 349.271 | 342.488                               |
| 132.539 | 120.870                               | 237.123 | 401.630                               | 352.363 | 343.880                               |
| 135.514 | 123.203                               | 245.532 | 775.114                               | 355.464 | 345.987                               |
| 138.467 | 124.869                               | 253.422 | 2296.900                              | 358.566 | 347.449                               |
| 141.394 | 126.571                               | 256.573 | 3292.554                              | 360.291 | 347.396                               |
| 144.306 | 128.621                               | 259.870 | 1393.508                              | 363.419 | 349.326                               |
| 147.255 | 130.010                               | 262.921 | 421.739                               | 366.556 | 353.292                               |
| 150.243 | 131.891                               | 266.054 | 327.408                               | 369.690 | 355.008                               |

|         |         |         |         |         |         |
|---------|---------|---------|---------|---------|---------|
| 153.213 | 133.822 | 269.158 | 317.989 | 372.825 | 358.212 |
| 156.167 | 135.316 | 272.238 | 322.196 | 375.965 | 360.314 |
| 159.112 | 136.865 | 275.269 | 322.761 | 379.119 | 361.359 |
| 162.099 | 137.912 | 278.236 | 323.757 | 382.281 | 366.896 |
| 165.124 | 138.944 | 281.251 | 324.581 | 385.454 | 372.556 |
| 168.135 | 139.620 | 284.297 | 324.990 | 388.638 | 375.818 |
| 171.137 | 140.817 | 287.249 | 326.329 | 392.829 | 375.492 |
| 174.133 | 141.570 | 290.168 | 325.812 |         |         |
| 177.120 | 141.950 | 293.090 | 327.169 |         |         |

---

Notes: The standard uncertainty (0.68 level of confidence):  $u(T) = 0.001$  K,  $u(p) = 0.001$ MPa. The expanded uncertainties  $U(C_{p,m})$  is at 0.95 confidence level, ( $k \approx 2$ ),  $U_c(C_{p,m}) = 0.002 \cdot C_{p,m}$ .

### Notes and references

- [1] Z.C. Tan, Q. Shi, B.P. Liu, H.T. Zhang, A Fully Automated Adiabatic Calorimeter For Heat Capacity Measurement Between 80 And 400 K, *J. Therm. Anal. Calorim.* 2008, **92**, 367-374.
- [2] K.H. Liang, Z.W. Lu, C.X. Ren, J. Wei, D. W. Fang, Feasibility of 1-Ethyl-4-butyl-1,2,4-triazolium Acetyl Amino Acid Ionic Liquids as Sustainable Heat-Transfer Fluids, *ACS Sustainable Chem. Eng.* 2022, **10**, 3417–3429.
